# Supplementary material for: Optogenetic induction of contractile ability in immature C2C12 myotubes
Source: PubMed Central journal article supplement (PMC4650824; doi:10.1038/srep08317), 2015-02-09

*Supplementary Information*

## **Optogenetic induction of contractile ability in immature C2C12 myotubes**

Toshifumi Asano<sup>1,2\*</sup>, Toru Ishizuka<sup>2,3</sup>, Keisuke Morishima<sup>1,4</sup>, and Hiromu Yawo<sup>2,3</sup>

<sup>1</sup>Department of Mechanical Engineering, Graduate School of Engineering,  
Osaka University, 2-1 Yamadaoka, Suita 565-0871, Japan

<sup>2</sup>Japan Science and Technology Agency (JST), Core Research of Evolutional  
Science & Technology (CREST), 5 Sanbancho, Chiyoda-ku 102-0075,  
Japan

<sup>3</sup>Department of Developmental Biology and Neuroscience, Tohoku University  
Graduate School of Life Sciences, 2-1-1 Katahira, Aoba-ku, Sendai 980-8577,  
Japan

<sup>4</sup>The Center for Advanced Medical Engineering and Informatics, Osaka University,  
2-2 Yamadaoka, Suita 565-0871, Japan

\*Correspondence to [asano@edk.vof.cer.or](mailto:asano@edk.vof.cer.or)

### Supplementary Figure S1

Sarcomere assembly with optical stimulation (OS) training. (A) A typical unstimulated channelrhodopsin-green receptor (ChRGR)-expressing myotube (control) and (B) another typical myotube immediately after OS training at 1 Hz for 2 h. Each image shows the immunohistochemical reaction to (from left to right) anti-GFP (green), anti-sarcomeric  $\alpha$ -actinin or fMHC (magenta), and a merged image of both. The insets are magnified images. The sarcomeric structures are indicated by arrows. Scale bar, 10  $\mu$ m.

### Supplementary Movie S1

Untrained responses of C2C12 myotubes to light pulses (duration, 100 ms; frequency, 1 Hz). The fluorescence image was overlaid on the phase-contrast image.

### Supplementary Movie S2

Responses of optical stimulation (OS)-trained C2C12 myotubes to light pulses (duration, 100 ms; frequency, 1 Hz). The contractile myotubes were all fluorescent with variable intensities.

Supplementary Figure S1

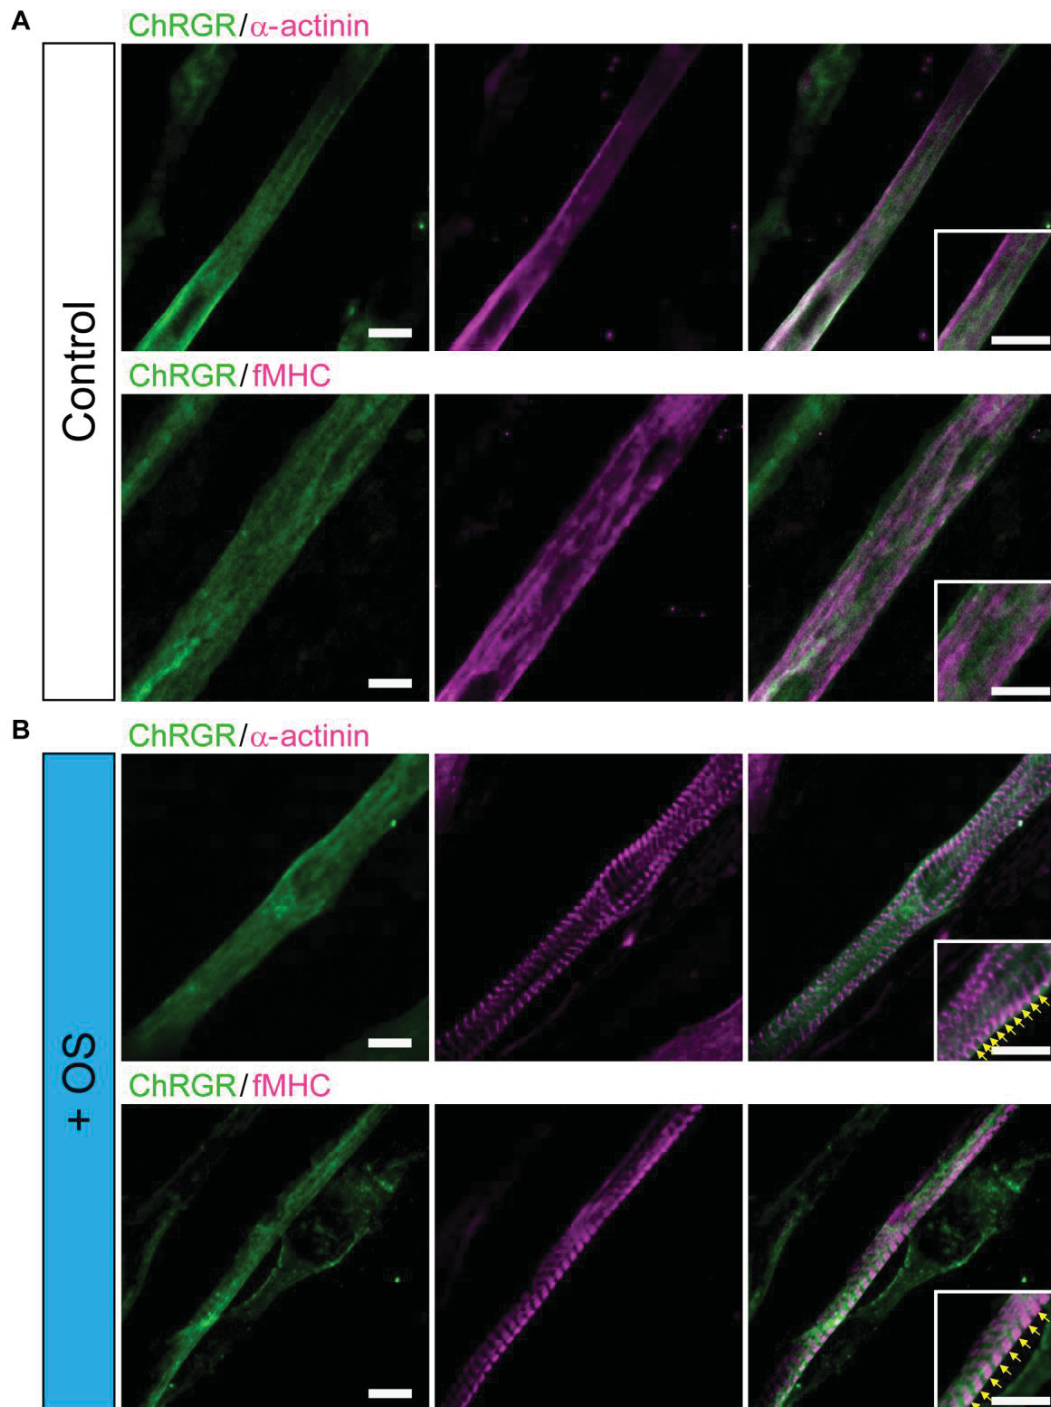

Supplement: srep08317-s1.pdf [file srep08317-s1.pdf]
